# Supplementary material
Source: Springer Nature journal article supplement (https://www.springermedizin.de/resource/supplementary/12885_2008_1400_MOESM9_ESM.pdf/9473032)

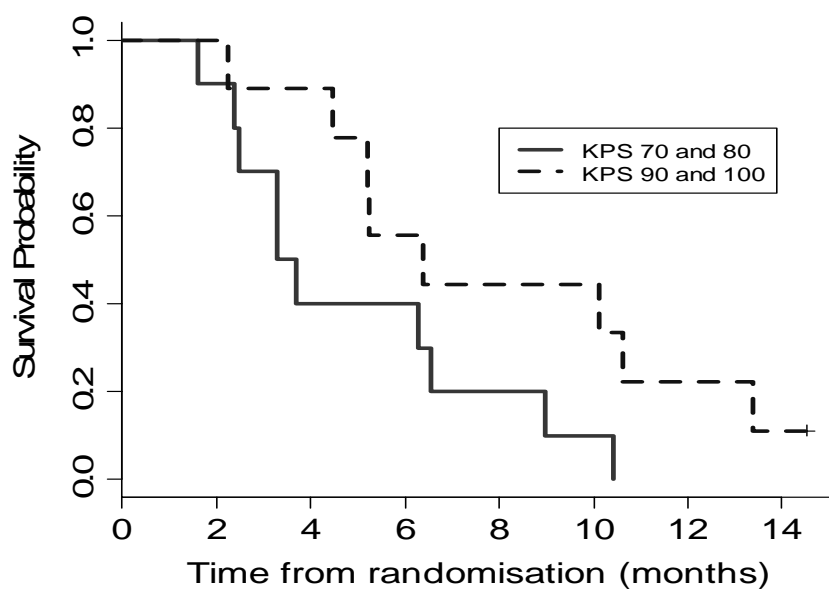

Log-Rank Test  
p=0.07

|            | Numbers at risk (months) |   |   |   |    | median (95%CI) |
|------------|--------------------------|---|---|---|----|----------------|
|            | 0                        | 3 | 6 | 9 | 12 |                |
| KPS 70/80  | 10                       | 7 | 4 | 1 | 0  | 3.5 (2.5-6.5)  |
| KPS 90/100 | 9                        | 8 | 5 | 4 | 2  | 6.4 (5.2-10.6) |

Supplement: MOESM9 [file 9473032]
